# Supplementary material
Source: PubMed Central journal article supplement (PMC2650139)
Supplement: 0806449106_0806449106SI.pdf [file 0806449106_0806449106SI.pdf]

# Supporting Information

Johnson et al. 10.1073/pnas.0806449106

## SI Text

**Mechanisms of Dietary Exposure.** Strong correlations between diet composition and protozoal infection in southern sea otters suggest a mechanism linking foraging behaviors with the probability of pathogen infection. In terrestrial systems, the only intermediate hosts propagating *T. gondii* and *S. neurona* infections are endothermic vertebrates (1–3). Sea otters in California feed almost exclusively on ectothermic invertebrates and do not prey on any currently recognized intermediate hosts for either pathogen. Direct ingestion of oocysts in seawater or filter-feeding bivalves has been proposed as a biologically plausible source of sea otter infections with *T. gondii* (4–6). Both field and laboratory studies have demonstrated the ability of filter-feeding marine invertebrates to concentrate other protozoa, such as *Giardia* and *Cryptosporidium* (7–10), in their gills and gastrointestinal tract. In the laboratory, California mussels (*Mytilus californianus*) and eastern oysters (*Crassostrea virginica*) have also been shown to remove *T. gondii* oocysts from experimentally contaminated water tanks (11, 12). New methods that use antibodies to concentrate sporocysts hold promise for detection of *T. gondii* in water (13), but these methods require further development to detect oocysts at exceedingly low concentrations in naturally contaminated water samples or ectothermic transport hosts in which the pathogen does not multiply. A recent field study by Miller et al. (14) screened 1,396 marine and estuarine invertebrates (mussels, clams, and sand crabs) collected predominantly during the rainy season near heavy freshwater outflows in central California with large populations of domestic cats, and type X *T. gondii* was detected in the digestive tract of just one sentinel mussel (*Mytilus californianus*) outplanted in an estuary draining into Monterey Bay. Our preliminary efforts to detect *T. gondii* in marine snails with known spiked quantities of oocysts were mostly unsuccessful at environmentally relevant concentrations, suggesting that these mucous-secreting benthic invertebrates may further inhibit the diagnostic sensitivity of tests available at commercial and research laboratories that have been successful in screening bivalves. These findings indicate that current methods to detect *T. gondii* (and likely *S. neurona*) may not be useful for epidemiologic studies until technology to effectively concentrate and detect oocysts in sea water, sediment, and invertebrate prey is further developed.

Because available diagnostic tests preclude the direct testing of marine snails as potential transport hosts for *T. gondii* infection in sea otters, it is important to explore alternate explanations. Although we controlled statistically for some factors that might alternatively explain trophic patterns in pathogen exposure, we cannot rule out the possibility that specialization on marine snails is linked to accompanying high-risk behaviors or microhabitat use at a scale that could not be measured. The feeding ecology of the prey themselves may be

associated with differential risk of encountering oocysts. Although both snails and abalone are herbivorous gastropods that graze primarily on macroalgae, snails are mobile and move along the kelp stipe or blades while grazing (15), whereas abalone reside in crevices and wait for drifting kelp to minimize risk of predation in areas with high sea otter density. Marine snail species tend to segregate vertically along kelp (16), but observations of otter foraging events are consistent with otters preying on any one of the three subtidal *Tegula* spp common along the central coast (*T. brunnea*, *T. montereyi*, or *T. pulligo*). Our direct observations of sea otter foraging activities and data retrieved from time-depth recorders indicate that snail-feeding otters dove to a mean depth of 8 m before returning to the surface with snails (17), suggesting that otters were feeding primarily on *Tegula* spp. gathered at the base of the kelp stipe or along the kelp forest floor. Otters feeding on abalone dove to similar (or slightly deeper) depths, but prey capture rates were much lower (17). In fact, correlations between diet-type and pathogen exposure might be explained simply as a function of prey size, because sea otters must eat hundreds of individual small prey, such as snails, but eat relatively few abalones to fulfill their daily caloric requirements (18). If each prey item was equally likely to be harboring an infective oocyst, smaller prey consumed by the hundreds would effectively pose a higher risk. Therefore, although marine snails warrant further investigation with improved laboratory detection techniques, they are not likely the only prey source exposing sea otters to *T. gondii*, nor could they be a source of infection for other marine mammals, such as sea lions, seals, and dolphins, that forage predominantly on fish.

Most otters were infected with protozoal pathogens by the time of first capture, so it is also possible that *T. gondii*-infected otters switched prey and specialized on marine snails because they were compromised by illness and unable to forage effectively or capture other prey. Brain infections with *T. gondii* have been shown to alter host behavior, specifically in mice and rats by blocking their innate aversion to cat urine (19). Likewise, sea otters with moderate or severe encephalitis caused by *T. gondii* were more vulnerable to attack by sharks (20). Although behavioral modification in parasitized otters cannot be ruled out, sea otters involved in this study were observed closely in the field and none exhibited signs consistent with encephalitis (muscle tremors, abnormal motor function, recurrent seizures). In fact, marine snail specialists in this study survived the entire follow-up period and we did not find evidence of deteriorating health during examinations at subsequent captures. Rather, sea otters specializing on marine snails maintained their territories, bred effectively and, based on analyses that combined observed prey capture rates with prey biomass and calorific density measurements (21), experienced rates of energy gain while foraging that were comparable to otters using alternate prey specializations.

1. Stanek JF, et al. (2002) Life cycle of *Sarcocystis neurona* in its natural intermediate host, the raccoon, *Procyon lotor*. *J Parasitol* 88:1151–1158.
2. Frenkel JK, Dubey JP (1972) Toxoplasmosis and its prevention in cats and man. *J Infect Dis* 126:664–673.
3. Dubey JP, Hamir AN (2000) Immunohistochemical confirmation of *Sarcocystis neurona* infections in raccoons, mink, cat, skunk, and pony. *J Parasitol* 86:1150–1152.
4. Cole RA, et al. (2000) Biological and molecular characterizations of *Toxoplasma gondii* strains obtained from southern sea otters (*Enhydra lutris nereis*). *J Parasitol* 86:526–530.
5. Miller MA, et al. (2002) Coastal freshwater runoff is a risk factor for *Toxoplasma gondii* infection of southern sea otters (*Enhydra lutris nereis*). *Int J Parasitol* 32:997–1006.
6. Dubey JP (2004) Toxoplasmosis: A waterborne zoonosis. *Vet Parasitol* 126:57–72.
7. Fayer R, et al. (1998) Survival of infectious *Cryptosporidium parvum* oocysts in seawater and eastern oysters (*Crassostrea virginica*) in the Chesapeake Bay. *Appl Environ Microbiol* 64:1070–1074.
8. Gomez-Bautista M, et al. (2000) Detection of infectious *Cryptosporidium parvum* oocysts in mussels (*Mytilus galloprovincialis*) and cockles (*Cerastoderma edule*). *Appl Environ Microbiol* 66:1866–1870.
9. Miller WA, et al. (2005) Clams (*Corbicula fluminea*) as bioindicators of fecal contamination with *Cryptosporidium* and *Giardia* spp. in freshwater ecosystems in California. *Int J Parasitol* 35:673–684.
10. Graczyk TK, et al. (1998) Detection of *Cryptosporidium* oocysts and *Giardia* cysts in the tissues of eastern oysters (*Crassostrea virginica*) carrying principal oyster infectious diseases. *J Parasitol* 84:1039–1042.

11. Lindsay DS, et al. (2004) Survival of *Toxoplasma gondii* oocysts in Eastern oysters (*Crassostrea virginica*). *J Parasitol* 90:1054–1057.
12. Arkush KD, et al. (2003) Molecular and bioassay-based detection of *Toxoplasma gondii* oocyst uptake by mussels (*Mytilus galloprovincialis*). *Int J Parasitol* 33:1087–1097.
13. Dumetre A, Darde ML (2007) Detection of *Toxoplasma gondii* in water by an immunomagnetic separation method targeting the sporocysts. *Parasitol Res* 101:989–996.
14. Miller MA, et al. (2008) Type X *Toxoplasma gondii* in a wild mussel and terrestrial carnivores from coastal California: New linkages between terrestrial mammals, runoff, and toxoplasmosis of sea otters. *Int J Parasitology* 38:1319–1328.
15. Watanabe JM (1984) Food preference, food quality, and diets of three herbivorous gastropods (*Trochidae:Tegula*) in a temperate kelp forest habitat. *Oecologia* 62:47–52.
16. Watanabe JM (1984) The influence of recruitment, competition, and benthic predation on spatial distributions of three species of kelp forest gastropods (*Trochidae:Tegula*). *Ecology* 65:920–936.
17. Tinker MT, Costa DP, Estes JA, Wieringa N (2007) Individual dietary specialization and dive behavior in the California sea otter: Using archival time-depth data to detect alternative foraging strategies. *Deep Sea Res II* 54:330–342.
18. Ostfeld RS (1982) Foraging strategies and prey switching in the California sea otter *Enhydra lutris*. *Oecologia* 53:170–178.
19. Vyas A, et al. (2007) Behavioral changes induced by *Toxoplasma* infection of rodents are highly specific to aversion of cat odors. *Proc Natl Acad Sci USA* 104:6442–6447.
20. Kreuder C, et al. (2003) Patterns of mortality in southern sea otters (*Enhydra lutris nereis*) from 1998–2001. *J Wildl Dis* 39:495–509.
21. Tinker MT, Estes JA, Bentall G (2008) Food limitation leads to behavioral diversification and dietary specialization in sea otters. *Proc Natl Acad Sci USA* 105:560–565.

**Table S1. Demographic, behavioral, and environmental risk factors evaluated for their association with protozoal pathogen infection in 118 radio-tagged sea otters**

| Risk factor                                   | Categories                      | <i>N</i> | <i>T. gondii</i> prevalence, % | <i>S. neurona</i> prevalence, % |
|-----------------------------------------------|---------------------------------|----------|--------------------------------|---------------------------------|
| <b>Dependent variables</b>                    |                                 |          |                                |                                 |
| <i>T. gondii</i> infection                    | Positive                        | 56       | -                              | -                               |
|                                               | Negative                        | 62       | -                              | -                               |
| <i>S. neurona</i> infection                   | Positive                        | 39       | -                              | -                               |
|                                               | Negative                        | 79       | -                              | -                               |
| <b>Independent variables</b>                  |                                 |          |                                |                                 |
| Age class                                     | Immature                        | 17       | 24                             | 18                              |
|                                               | Adults                          | 101      | 52                             | 36                              |
| Sex                                           | Males                           | 48       | 46                             | 40                              |
|                                               | Females                         | 70       | 49                             | 29                              |
| Mean 90-day move                              | <1 km                           | 18       | 50                             | 28                              |
|                                               | 1–2 km                          | 24       | 38                             | 46                              |
|                                               | 3–4 km                          | 21       | 57                             | 29                              |
|                                               | 5–15 km                         | 19       | 53                             | 37                              |
|                                               | 16–50 km                        | 13       | 31                             | 38                              |
|                                               | 51–190 km                       | 16       | 44                             | 31                              |
| Abalone specialists*                          | Abalone <10% of diet            | 53       | 59                             | 40                              |
|                                               | Abalone >10% of diet            | 8        | 13                             | 0                               |
| Clam specialists*                             | Clams <10% of diet              | 46       | 54                             | 33                              |
|                                               | Clams >10% of diet              | 15       | 47                             | 40                              |
| Snail specialists*                            | Snails <10% of diet             | 51       | 45                             | 35                              |
|                                               | Snails >10% of diet             | 10       | 90                             | 30                              |
| Offshore habitat use*                         | <20% feeding offshore           | 40       | 43                             | 33                              |
|                                               | 20–50% feeding offshore         | 12       | 58                             | 33                              |
|                                               | >50% feeding offshore           | 9        | 89                             | 44                              |
| Exposed rocky cliff habitat use*              | <20% feeding along rocky cliff  | 55       | 49                             | 31                              |
|                                               | >20% feeding along rocky cliff  | 6        | 83                             | 67                              |
| Rocky bench habitat use*                      | <20% feeding in rocky bench     | 28       | 61                             | 39                              |
|                                               | >20% feeding in rocky bench     | 33       | 46                             | 30                              |
| Developed shore habitat use* (soft substrate) | Feeding elsewhere in range      | 51       | 55                             | 28                              |
|                                               | Feeding in developed shore      | 10       | 40                             | 70                              |
| Capitola to Seaside                           | Never in Capitola to Seaside    | 79       | 53                             | 23                              |
|                                               | Observed in Capitola to Seaside | 39       | 36                             | 54                              |
| Monterey Peninsula                            | Never in Monterey Peninsula     | 71       | 58                             | 21                              |
|                                               | Observed in Monterey Peninsula  | 47       | 32                             | 51                              |
| San Simeon/Cambria                            | Never in San Simeon/Cambria     | 58       | 35                             | 40                              |
|                                               | Observed San Simeon/Cambria     | 60       | 60                             | 27                              |

\*Based on feeding observations, data only available for subset of 61 otters with >300 observed foraging dives.
